# Supplementary material
Source: publisher figshare collection journal article supplement (https://sage.figshare.com/ndownloader/files/23742645)
Supplement: Supplementary file 1 [file 23742645]

Supplementary Figure 1 A

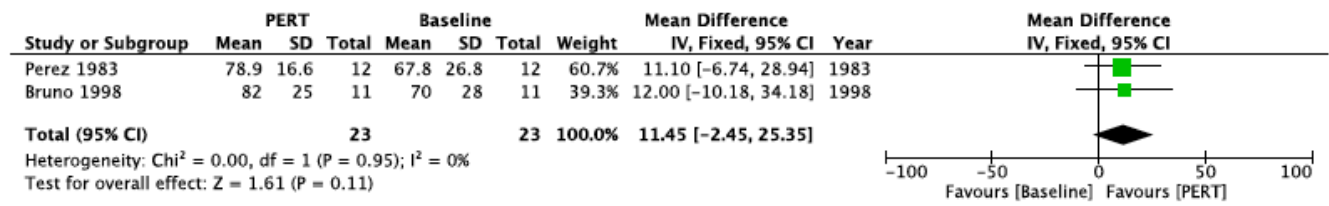

Supplementary Figure 1 B

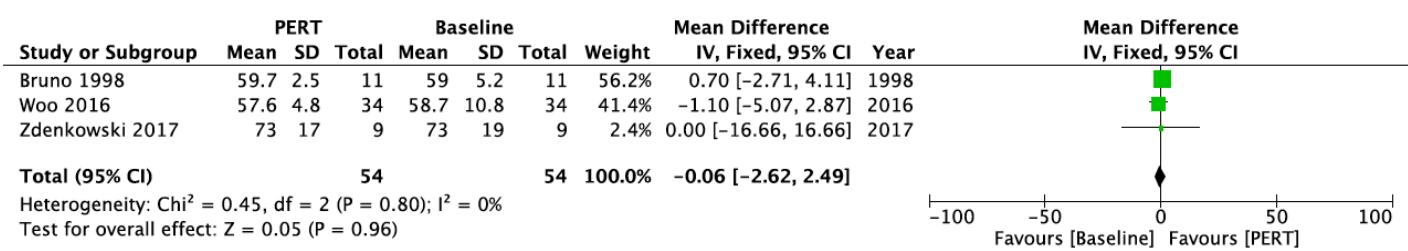

# Supplementary Figure 2

A

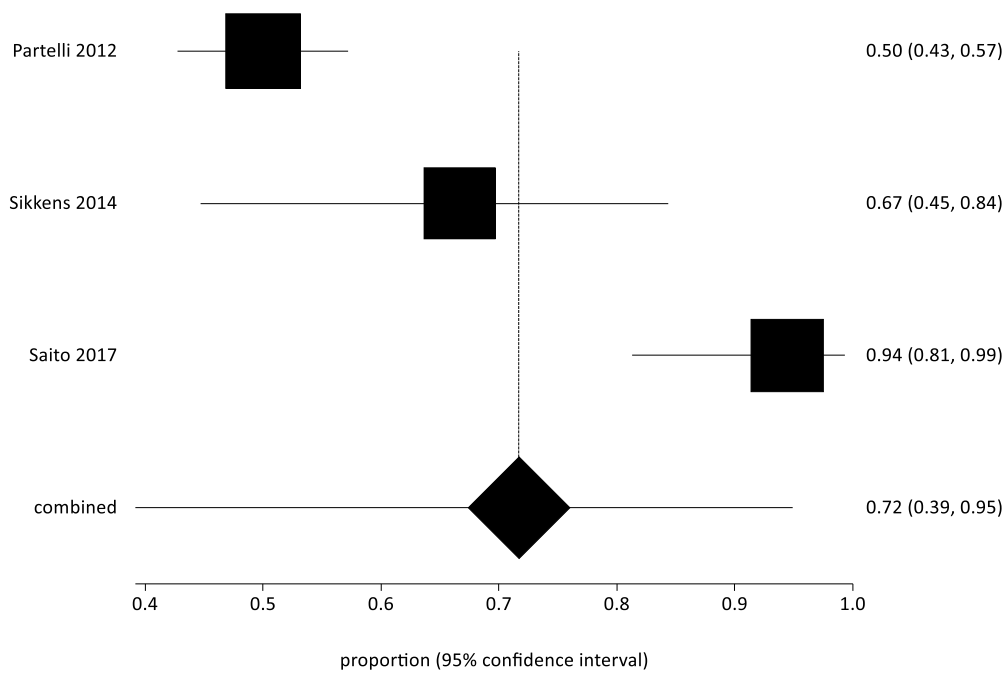

B

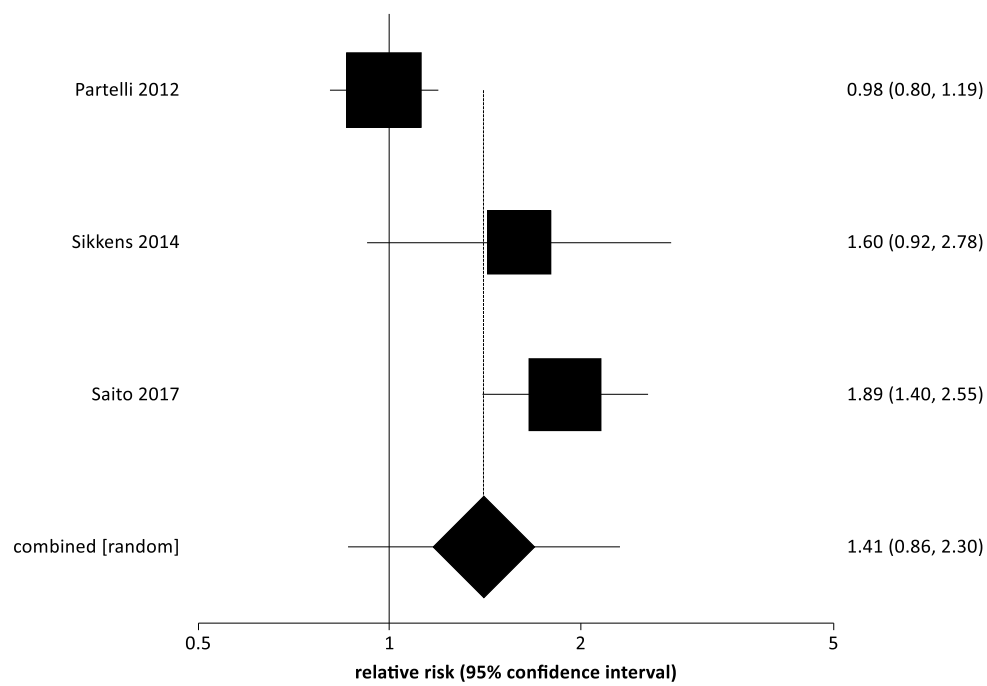

# Supplementary Figure 3

A

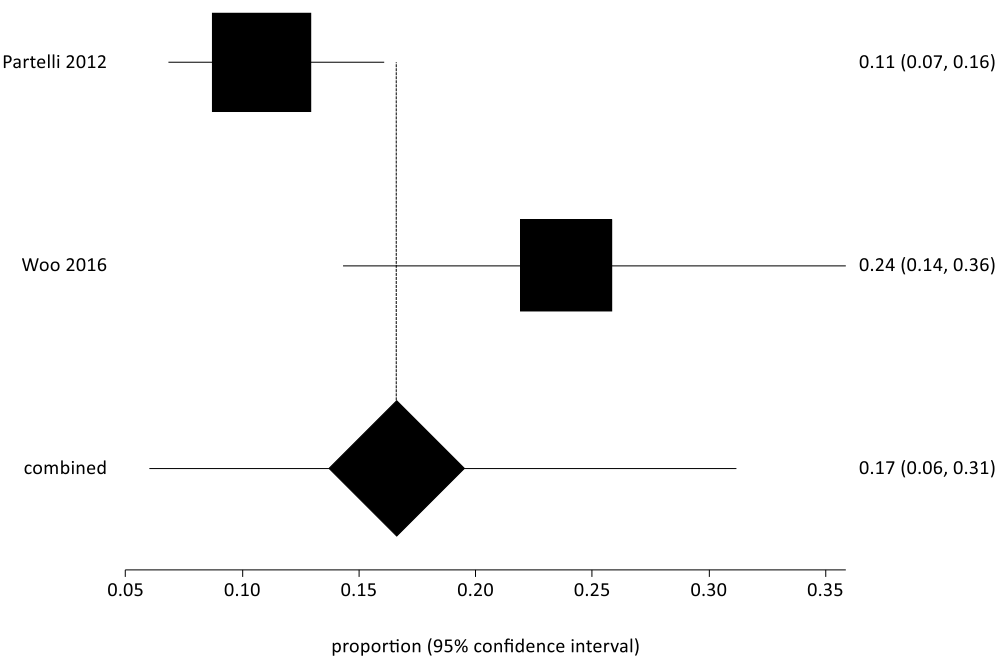

B

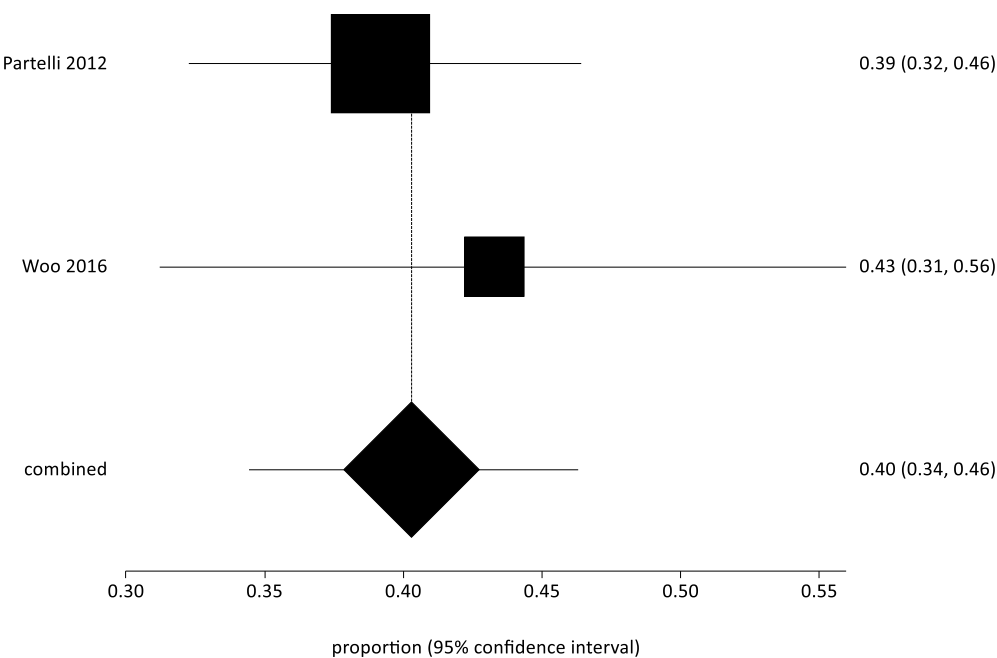

# Supplementary Figure 4

A

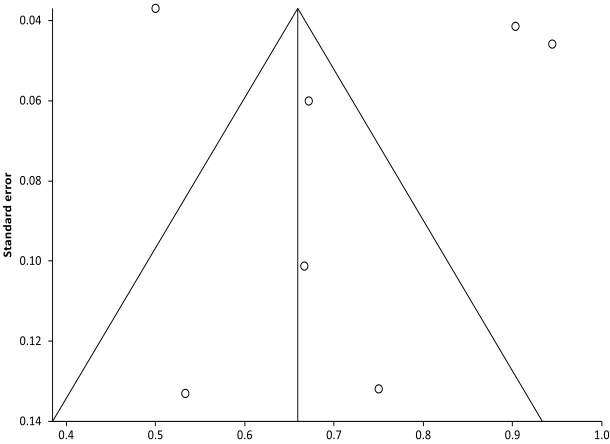

D

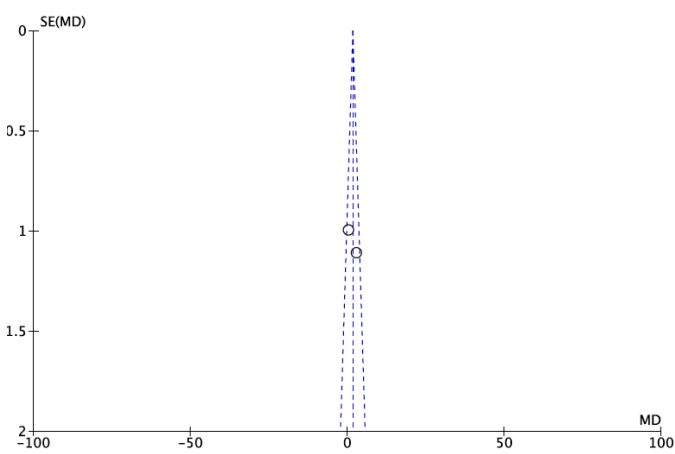

B

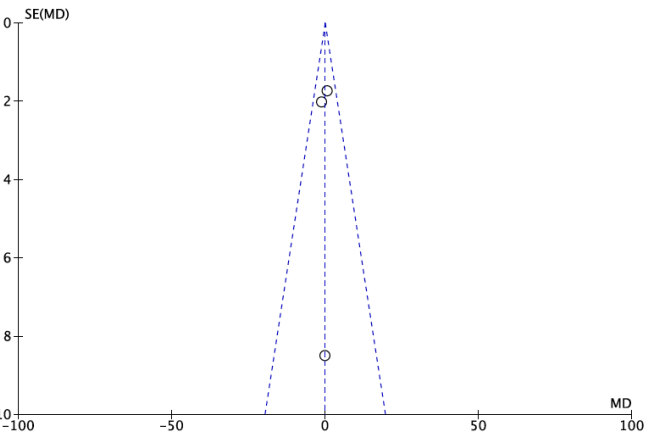

E

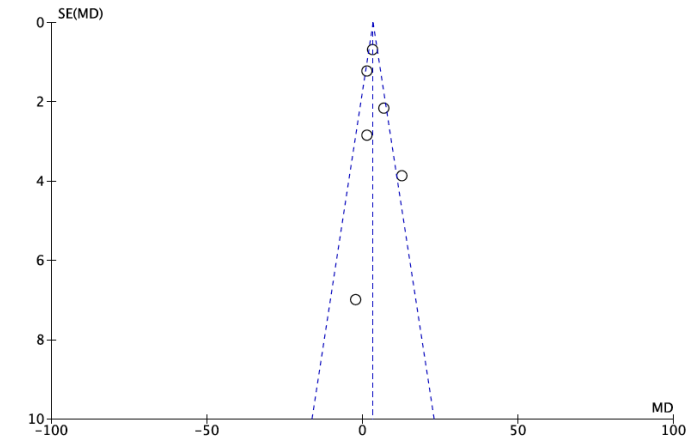

C

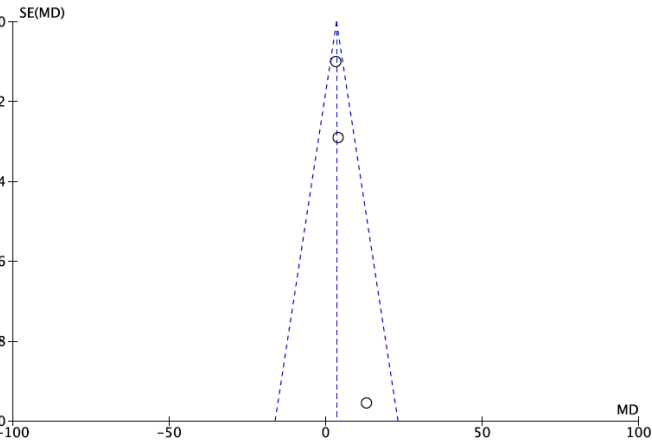

**Supplementary Table 1A.** Quality assessment of included cohort studies by the Newcastle-Ottawa scale

|                                 | Representativeness of the exposed cohort | Selection of the non-exposed cohort | Ascertainment of exposure | Demonstration that outcome of interest was not present at start of study | Comparability of cohorts on the basis of the design or analysis | Assessment of outcome | Was follow-up long enough for outcomes to occur | Adequacy of follow-up of cohorts |
|---------------------------------|------------------------------------------|-------------------------------------|---------------------------|--------------------------------------------------------------------------|-----------------------------------------------------------------|-----------------------|-------------------------------------------------|----------------------------------|
| <b>Dominguez-Munoz 2018</b>     | +                                        | +                                   | +                         | ?                                                                        | +                                                               | +                     | +                                               | ?                                |
| <b>Landers 2019</b>             | +                                        | +                                   | +                         | ?                                                                        | +                                                               | +                     | +                                               | +                                |
| <b>Partelli 2012</b>            | +                                        | +                                   | +                         | +                                                                        | +                                                               | +                     | +                                               | +                                |
| <b>Salto 2017</b>               | +                                        | +                                   | +                         | +                                                                        | +                                                               | +                     | +                                               | ?                                |
| <b>Sikkens 2014</b>             | +                                        | +                                   | +                         | ?                                                                        | ?                                                               | +                     | +                                               | +                                |
| <b>Witvliet-van Nierop 2018</b> | +                                        | +                                   | +                         | ?                                                                        | ?                                                               | +                     | ?                                               | ?                                |

Risk of bias of included cohort studies. Risk of bias were assessed base on Newcastle-Ottawa Scale. Green dots indicate low risk of bias; yellow dots indicate unclear risk of bias and red dots indicate high risk of bias.

**Supplementary Table 1B.** Quality Assessment of Included Randomized Controlled Trials by the Jadad Score

|                        | Randomization | Double blinding | Drop-out or withdrawal | Allocation concealment |
|------------------------|---------------|-----------------|------------------------|------------------------|
| <b>Bruno 1998</b>      | ?             | +               | -                      | ?                      |
| <b>Salto 2018</b>      | +             | -               | +                      | ?                      |
| <b>Woo 2016</b>        | ?             | +               | +                      | ?                      |
| <b>Zdenkowski 2017</b> | +             | +               | -                      | ?                      |

Risk of bias of included randomized clinical trials. Risk of bias were assessed based on Jada scale. Green dots indicated low risk of bias (2 points in Jadad scale); yellow dots indicate unclear risk of bias (1 point in Jadad scale) and red dots indicate high risk of bias (0 point in Jadad scale)

**Supplementary Table 2.** Results of Subgroup Analyses

| Subgroups            | No. of studies | No. of patients | No. of PEI | Effect estimate                | Heterogeneity           |                |
|----------------------|----------------|-----------------|------------|--------------------------------|-------------------------|----------------|
|                      |                |                 |            | Pool prevalence, %<br>(95% CI) | <i>I</i> <sup>2</sup> % | <i>P</i> value |
| High quality studies | 7              | 410             | 265        | 72 (55-86)                     | 90                      | < .0001        |
| Sample size ≥ 30     | 4              | 359             | 232        | 77 (53-94)                     | 95                      | < .0001        |
| Western population   | 4              | 245             | 130        | 57 (46-67)                     | 35                      | .198           |
| Eastern population   | 3              | 165             | 135        | 85 (66-97)                     | 87                      | .0004          |
| RCT studies          | 2              | 129             | 101        | 79 (53-96)                     | 91                      | < .0001        |

PEI, pancreatic exocrine insufficiency; CI, confidence interval; RCT; randomized control trial

**Supplementary Table 3.** Results of Sensitivity Analyses

| Variables                          | No. of studies | No. of patients | No. of PEI | Effect estimate                | Heterogeneity           |                |
|------------------------------------|----------------|-----------------|------------|--------------------------------|-------------------------|----------------|
|                                    |                |                 |            | Pool prevalence, %<br>(95% CI) | <i>I</i> <sup>2</sup> % | <i>P</i> value |
| Studies used direct test for EPI   | 4              | 310             | 179        | 65 (50-79)                     | 81                      | < .0013        |
| Studies used indirect test for EPI | 4              | 125             | 107        | 81 (64-94)                     | 77                      | < .0051        |
| Studies used only FE-1 test        | 3              | 285             | 158        | 60 (46-72)                     | 72                      | .027           |

PEI, pancreatic exocrine insufficiency; CI, confidence interval; FE-1, fecal elastase-1.



**Supplementary Table 4. Results of Meta-regression Analyses**

|                           | Pooled prevalence (95% CI), <i>P</i> value <sup>a</sup> |                                |                                |                                  |                               |                               |                                     |
|---------------------------|---------------------------------------------------------|--------------------------------|--------------------------------|----------------------------------|-------------------------------|-------------------------------|-------------------------------------|
|                           | Year of publication                                     | Sex (men, %)                   | Age (year)                     | Population (Western)             | Population > 30               | Type of PEI test              | Adjusted R-squared <sup>b</sup> (%) |
| Univariate                | 0.003 (-0.022 to 0.028), 0.782                          | 0.008 (-0.031 to 0.048), 0.598 | 0.044 (-0.001 to 0.09), 0.055  | -0.286 (-0.549 to -0.023), 0.038 | 0.074 (-0.421 to 0.57), 0.716 | 0.297 (0.018 to 0.576), 0.041 |                                     |
| Multivariate <sup>c</sup> |                                                         |                                | 0.022 (-0.001 to 0.045), 0.054 | -0.139 (-0.309 to 0.031), 0.080  |                               | 0.167 (0.008 to 0.324), 0.044 | 87                                  |

CI, confidence interval; PEI, pancreatic exocrine insufficiency.

<sup>a</sup>Two-sided *P* value.

<sup>b</sup>Proportion of variability between studies explained.

<sup>c</sup>Included covariates in the full model which have more influence in the heterogeneity.

Pubmed:

((pancreatic cancer[Title/Abstract]) OR (pancreatic neoplasm[Title/Abstract]) OR (carcinoma, pancreatic ductal [MeSH])) AND (( pancreatic function[Title/Abstract]) OR (exocrine pancreatic function[Title/Abstract]) OR (pancreatic insufficiency[MeSH Terms]) OR (exocrine pancreatic insufficiency[MeSH Terms]) OR (pancreas function[Title/Abstract]) OR (pancreas dysfunction[Title/Abstract]) OR (enzyme replacement therapy [MeSH Terms]) OR (Exocrine Pancreatic Insufficiency/drug therapy[MAJR]) OR (Enzyme Therapy[MAJR]))

Scopus:

(TITLE-ABS-KEY (pancreas PRE/3 cancer OR "pancreatic cancer" OR "pancreas neoplasm") AND TITLE-ABS-KEY ("exocrine pancreatic funct\*" OR "exocrine insuffien\*" OR "exocrine pancreatic insufficien\*" OR "pancrea\* insufficien\*" OR "pancrea\* funct\*" OR "pancrea\* dysfunct\*" OR "enzyme replacement therap\*")) AND (LIMIT-TO(EXACTKEYWORD, "Human"))

Embase:

((pancreas adj3 cancer).ti,sh. or (pancreatic adj3 cancer).ab,ti,sh. or (pancreas adj3 neoplasm).ab,ti,sh.) and ((exocrine pancreatic function or exocrine pancreatic insufficiency).ab,ti,sh. or pancrea\* insufficien\*.ab,sh,ti. or pancrea\* funct\*.ab,ti,sh. or pancrea\* dysfunct\*.ab,ti,sh. or enzyme replacement therapy.ti,sh.) and human.sh.
